# Supplementary material for: Dynamic interaction of theory and experiment: total determination of the gas-phase molecular structure of tri-tert-butylphosphine oxide (OPBut3)
Source: Royal Society of Chemistry journal article supplement (doi:10.1039/b313451b), 2004-01-01
Supplement: b313451b.doc [file b313451b.doc]

Supplementary Data

**Table S3** Experimental gas electron diffraction coordinates from the SARACEN refinement of OPBut3.

| Atom | *x* | *y* | *z* |
| --- | --- | --- | --- |
| O(1) | -1.4978 | 0.0000 | 0.0000 |
| P(2) | 0.0000 | 0.0000 | 0.0000 |
| C(3) | 0.5791 | 1.7984 | 0.0000 |
| C(4) | -0.3830 | 2.5984 | 0.9070 |
| C(5) | 2.0555 | 2.0537 | 0.3780 |
| C(6) | 0.4382 | 2.3904 | -1.4205 |
| C(7) | 0.5791 | -0.8992 | 1.5575 |
| C(8) | -0.3830 | -2.0847 | 1.7968 |
| C(9) | 2.0555 | -1.3543 | 1.5896 |
| C(10) | 0.4382 | 0.0350 | 2.7804 |
| C(11) | 0.5791 | -0.8992 | -1.5575 |
| C(12) | -0.3830 | -0.5137 | -2.7038 |
| C(13) | 2.0555 | -0.6995 | -1.9676 |
| C(14) | 0.4382 | -2.4254 | -1.3599 |
| H(15) | -0.2460 | 3.6773 | 0.7626 |
| H(16) | -0.2011 | 2.3688 | 1.9644 |
| H(17) | -1.4274 | 2.3523 | 0.6782 |
| H(18) | 2.3023 | 3.1186 | 0.2831 |
| H(19) | 2.7281 | 1.4868 | -0.2777 |
| H(20) | 2.2498 | 1.7485 | 1.4138 |
| H(21) | 0.5873 | 3.4773 | -1.4050 |
| H(22) | -0.5599 | 2.1877 | -1.8287 |
| H(23) | 1.1809 | 1.9528 | -2.0992 |
| H(24) | -0.2460 | -2.4991 | 2.8034 |
| H(25) | -0.2011 | -2.8856 | 1.0693 |
| H(26) | -1.4274 | -1.7635 | 1.6981 |
| H(27) | 2.3023 | -1.8045 | 2.5592 |
| H(28) | 2.7281 | -0.5029 | 1.4264 |
| H(29) | 2.2498 | -2.0986 | 0.8073 |
| H(30) | 0.5873 | -0.5219 | 3.7139 |
| H(31) | -0.5599 | 0.4898 | 2.8089 |
| H(32) | 1.1809 | 0.8416 | 2.7408 |
| H(33) | -0.2460 | -1.1782 | -3.5660 |
| H(34) | -0.2011 | 0.5168 | -3.0336 |
| H(35) | -1.4274 | -0.5889 | -2.3762 |
| H(36) | 2.3023 | -1.3141 | -2.8423 |
| H(37) | 2.7281 | -0.9839 | -1.1488 |
| H(38) | 2.2498 | 0.3502 | -2.2211 |
| H(39) | 0.5873 | -2.9554 | -2.3090 |
| H(40) | -0.5599 | -2.6775 | -0.9803 |
| H(41) | 1.1809 | -2.7944 | -0.6415 |

**Table S2** Least squares correlation matrix ( 100) for the SARACEN GED refinement of OPBut3.*a*

|  | *p*1 | *p*3 | *p*5 | *p*6 | *p*8 | *p*9 | *p*10 | *p*12 | *u*1 | *u*50 | *u*52 | *k*1 |
| --- | --- | --- | --- | --- | --- | --- | --- | --- | --- | --- | --- | --- |
| *p*2 |  |  | -66 |  |  |  | -52 | -65 |  |  |  |  |
| *p*3 | -84 |  |  |  |  |  |  |  |  |  |  |  |
| *p*4 |  |  |  | -54 |  |  |  |  |  |  |  |  |
| *p*7 |  |  |  | 62 |  |  |  |  |  |  |  |  |
| *p*8 |  |  | -61 |  |  |  |  |  |  |  |  |  |
| *p*10 |  |  |  |  | -72 |  |  |  |  |  |  |  |
| *u*1 | -56 | 69 |  |  |  |  |  |  |  |  |  |  |
| *u*29 |  |  |  |  |  |  |  |  |  |  |  |  |
| *u*30 |  |  |  | 53 |  |  |  |  |  |  |  |  |
| *u*37 |  |  |  |  | -90 | -51 | 62 |  |  |  |  |  |
| *u*52 |  |  |  |  |  |  |  |  |  | 53 |  |  |
| *u*54 |  |  |  |  |  |  |  |  |  |  | 71 |  |
| *k*2 |  |  |  |  |  |  |  |  | 53 |  |  | 50 |

*a* Only elements with absolute values  50% are shown; *k*1 and *k*2 are scale factors.

**Table S1** Interatomic distances (*r*/pm) and amplitudes of vibration (*u*/pm) for the SARACEN GED structure of OPBut3.*a,b*

| No. | Atom Pair | *r*a / pm | *u* /pm*b* | Restraint |
| --- | --- | --- | --- | --- |
| *u*1 | C(4)-C(3) | 154.5(2) | 5.5(3) |  |
| *u*2 | H(15)-C(4) | 109.7(2) | 8.1(2) |  |
| *u*3-28 | H(X)-C(X) | 109.7(2) | 8.1(all tied to *u*2) |  |
| *u*29 | C(3)-P(2) | 188.9(3) | 6.4(3) |  |
| *u*30 | C(6)…P(2) | 281.5(6) | 9.3(6) |  |
| *u*31 | C(5)…P(2) | 293.0(9) | 8.8(tied to *u*30) |  |
| *u*32 | C(4)…P(2) | 277.9(8) | 8.6(tied to *u*30) |  |
| *u*33 | P(2)-O(1) | 149.8(6) | 3.8(tied to *u*1) |  |
| *u*34 | H(15)-C(3) | 218.9(7) | 11.6(6) |  |
| *u*35 | C(3)...O(1) | 274.7(4) | 6.4(6) | 7.1(7) |
| *u*36 | C(4)…O(1) | 296.9(9) | 11.5(10) | 11.5(11) |
| *u*37 | C(6)…C(5) | 244.2(33) | 5.7(17) |  |
| *u*38 | C(5)…C(4) | 255.4(21) | 5.7(tied to *u*37) |  |
| *u*39 | C(6)…C(4) | 247.7(25) | 5.4(tied to *u*37) |  |
| *u*40 | C(6)…O(1) | 338.8(10) | 13.0(13) | 12.6(13) |
| *u*41 | C(5)…O(1) | 412.2(11) | 7.3(14) |  |
| *u*42 | C(7)…C(3) | 311.5(6) | 8.0(7) | 7.6(8) |
| *u*43 | C(10)…C(5) | 353.0(32) | 12.0(11) | 13.9(14) |
| *u*44 | C(10)…C(3) | 329.6(17) | 9.0(7) | 10.1(10) |
| *u*45 | C(9)…C(5) | 361.7(27) | 15.3(14) | 15.0(15) |
| *u*46 | C(7)…C(5) | 350.6(13) | 9.9(tied to *u*43) |  |
| *u*47 | C(10)…C(4) | 327.9(16) | 10.7(tied to *u*44) |  |
| *u*48 | C(9)…C(3) | 382.7(16) | 10.4(11) | 10.7(11) |
| *u*49 | C(7)…C(4) | 368.5(16) | 9.9(tied to *u*45) |  |
| *u*50 | C(7)…C(6) | 444.0(5) | 8.4(12) |  |
| *u*51 | C(8)…C(3) | 438.5(7) | 8.6(tied to *u*50) |  |
| *u*52 | C(9)…C(4) | 469.4(22) | 11.9(15) |  |
| *u*53 | C(10)…C(6) | 481.6(13) | 10.5(tied to *u*52) |  |
| *u*54 | C(9)…C(6) | 506.9(22) | 9.5(17) |  |
| *u*55 | C(8)…C(5) | 500.8(12) | 9.1(tied to *u*54) |  |
| *u*56 | C(8)…C(4) | 476.7(15) | 12.2(tied to *u*52) |  |
| *u*57 | C(8)…C(6) | 557.2(8) | 15.3(29) |  |
| *u*58 | H(22)…P(2) | 290.6(24) | 17.0(16) | 16.3(16) |
| *u*59 | H(19)…P(2) | 311.9(24) | 17.1(tied to *u*58) |  |
| *u*60 | H(16)…H(15) | 177.7(8) | 11.8(fixed) |  |
| *u*61 | H(20)…P(2) | 318.1(27) | 16.4(tied to *u*58) |  |
| *u*62 | H(17)…P(2) | 283.4(22) | 17.6(tied to *u*58) |  |
| *u*63 | H(23)…P(2) | 310.1(25) | 15.7(tied to *u*58) |  |
| *u*64 | H(16)…P(2) | 308.4(26) | 18.7(tied to *u*58) |  |
| *u*65 | H(21)…P(2) | 379.6(7) | 12.2(34) |  |
| *u*66 | H(18)…P(2) | 388.7(9) | 11.9(tied to *u*65) |  |
| *u*67 | H(15)…P(2) | 376.4(8) | 11.8(tied to *u*65) |  |

*a* Estimated standard deviations, obtained in the least-squares refinement, are given in parentheses.

*b* Amplitudes not refined were fixed at the values obtained using the HF/6-31G* force field.

**Table S4** Interatomic distances (*r*/pm) and amplitudes of vibration (*u*/pm) for the DYNAMITE GED structure of OPBut3.*a,b*

| No. | Atom Pair | *r*a / pm | *u* /pm*b* | Restraint |
| --- | --- | --- | --- | --- |
| *u*1 | C(4)-C(3) | 154.7(3) | 5.8(2) |  |
| *u*2-28 | H(X)-C(X) | 110.6-111.3 | 8.6(2) |  |
| *u*29 | C(3)-P(2) | 188.7(2) | 6.5(4) |  |
| *u*30 | C(6)…P(2) | 281.3(6) | 9.0(7) |  |
| *u*31 | C(5)…P(2) | 293.2(11) | 8.5(tied to *u*30) |  |
| *u*32 | C(4)…P(2) | 277.8(5) | 8.3(tied to *u*30) |  |
| *u*33 | P(2)-O(1) | 149.5(6) | 4.1(tied to *u*1) |  |
| *u*34 | H(15)-C(3) | 219.0(7) | 11.9(6) |  |
| *u*35 | C(3)...O(1) | 274.8(4) | 7.0(6) | 7.1(7) |
| *u*36 | C(4)…O(1) | 298.7(9) | 10.9(10) | 11.5(11) |
| *u*37 | C(6)…C(5) | 247.3(39) | 7.3(6) |  |
| *u*38 | C(5)…C(4) | 252.1(11) | 7.3(tied to *u*37) |  |
| *u*39 | C(6)…C(4) | 248.7(31) | 7.0(tied to *u*37) |  |
| *u*40 | C(6)…O(1) | 337.6(10) | 12.9(11) | 12.6(13) |
| *u*41 | C(5)…O(1) | 412.1(11) | 7.0(13) |  |
| *u*42 | C(7)…C(3) | 310.7(8) | 8.1(7) | 7.6(8) |
| *u*43 | C(10)…C(5) | 352.4(44) | 13.0(11) | 13.9(14) |
| *u*44 | C(10)…C(3) | 329.8(10) | 8.9(7) | 10.1(10) |
| *u*45 | C(9)…C(5) | 361.9(24) | 15.3(12) | 15.0(15) |
| *u*46 | C(7)…C(5) | 348.8(36) | 10.7(tied to *u*43) |  |
| *u*47 | C(10)…C(4) | 324.4(22) | 10.6(tied to *u*44) |  |
| *u*48 | C(9)…C(3) | 383.1(12) | 10.4(10) | 10.7(11) |
| *u*49 | C(7)…C(4) | 366.1(15) | 9.9(tied to *u*45) |  |
| *u*50 | C(7)…C(6) | 443.6(7) | 8.8(11) |  |
| *u*51 | C(8)…C(3) | 438.9(6) | 9.0(tied to *u*50) |  |
| *u*52 | C(9)…C(4) | 467.9(21) | 12.4(16) |  |
| *u*53 | C(10)…C(6) | 481.8(8) | 10.9(tied to *u*52) |  |
| *u*54 | C(9)…C(6) | 508.2(10) | 10.0(20) |  |
| *u*55 | C(8)…C(5) | 499.6(33) | 9.6(tied to *u*54) |  |
| *u*56 | C(8)…C(4) | 477.5(12) | 12.7(tied to *u*52) |  |
| *u*57 | C(8)…C(6) | 557.2(9) | 15.7(30) |  |

*a* Estimated standard deviations, obtained in the least-squares refinement, are given in parentheses.

*b* Amplitudes not refined were fixed at the values obtained using the HF/6-31G* force field.

**Table S6** Experimental gas electron diffraction coordinates from the DYNAMITE refinement of OPBut3.

| Atom | *x* | *y* | *z* |
| --- | --- | --- | --- |
| O(1) | -1.4959 | 0.0000 | 0.0000 |
| P(2) | 0.0000 | 0.0000 | 0.0000 |
| C(3) | 0.5851 | 1.7943 | 0.0000 |
| C(4) | -0.3637 | 2.5919 | 0.9229 |
| C(5) | 2.0512 | 2.0612 | 0.4096 |
| C(6) | 0.4440 | 2.3881 | -1.4198 |
| C(7) | 0.5851 | -0.8971 | 1.5539 |
| C(8) | -0.3637 | -2.0952 | 1.7832 |
| C(9) | 2.0512 | -1.3853 | 1.5803 |
| C(10) | 0.4440 | 0.0356 | 2.7780 |
| C(11) | 0.5851 | -0.8971 | -1.5539 |
| C(12) | -0.3637 | -0.4967 | -2.7061 |
| C(13) | 2.0512 | -0.6759 | -1.9899 |
| C(14) | 0.4440 | -2.4236 | -1.3582 |
| H(15) | -0.2014 | 3.6815 | 0.7878 |
| H(16) | -0.1943 | 2.3724 | 1.9909 |
| H(17) | -1.4255 | 2.3816 | 0.6836 |
| H(18) | 2.2951 | 3.1395 | 0.3136 |
| H(19) | 2.7463 | 1.4933 | -0.2402 |
| H(20) | 2.2488 | 1.7705 | 1.4563 |
| H(21) | 0.5898 | 3.4880 | -1.3927 |
| H(22) | -0.5762 | 2.2055 | -1.8138 |
| H(23) | 1.1917 | 1.9827 | -2.1227 |
| H(24) | -0.2014 | -2.5230 | 2.7944 |
| H(25) | -0.1943 | -2.9104 | 1.0591 |
| H(26) | -1.4255 | -1.7828 | 1.7208 |
| H(27) | 2.2951 | -1.8413 | 2.5621 |
| H(28) | 2.7463 | -0.5386 | 1.4133 |
| H(29) | 2.2488 | -2.1465 | 0.8052 |
| H(30) | 0.5898 | -0.5379 | 3.7171 |
| H(31) | -0.5762 | 0.4680 | 2.8169 |
| H(32) | 1.1917 | 0.8470 | 2.7784 |
| H(33) | -0.2014 | -1.1585 | -3.5822 |
| H(34) | -0.1943 | 0.5380 | -3.0500 |
| H(35) | -1.4255 | -0.5988 | -2.4044 |
| H(36) | 2.2951 | -1.2982 | -2.8757 |
| H(37) | 2.7463 | -0.9546 | -1.1731 |
| H(38) | 2.2488 | 0.3760 | -2.2615 |
| H(39) | 0.5898 | -2.9501 | -2.3244 |
| H(40) | -0.5762 | -2.6736 | -1.0031 |
| H(41) | 1.1917 | -2.8297 | -0.6557 |

**Table S5** Least squares correlation matrix ( 100) for the DYNAMITE GED refinement of OPBut3.*a*

|  | *p*1 | *p*3 | *p*6 | *p*7 | *p*8 | *p*10 | *p*11 | *p*12 | *u*2 | *u*50 | *u*52 | *k*1 |
| --- | --- | --- | --- | --- | --- | --- | --- | --- | --- | --- | --- | --- |
| *p*7 | 59 |  | -57 |  |  |  |  | -56 |  |  |  |  |
| *p*10 |  |  |  | -66 | -55 |  | 68 | 66 |  |  |  |  |
| *p*12 |  |  |  |  |  |  | 54 |  |  |  |  |  |
| *u*1 |  | 69 |  |  |  |  |  |  |  |  |  |  |
| *u*29 |  |  |  |  |  | -56 |  |  |  |  |  |  |
| *u*37 |  |  |  |  | -74 | 59 |  |  |  |  |  |  |
| *u*52 |  |  |  |  |  |  |  |  |  | 55 |  |  |
| *u*54 |  |  |  |  |  |  |  |  |  |  | 72 |  |
| *u*65 | 57 |  |  |  |  |  |  |  |  |  |  |  |
| *k*2 |  |  |  |  |  |  |  |  | 51 |  |  | 53 |

*a* Only elements with absolute values  50% are shown; *k*1 and *k*2 are scale factors.

**Table S7** Calculated parameters for C3v molecular structure of OPMe3 at the HF/6-31G*, MP2/6-31G* and MP2/6-311G* levels.*a*

| Parameter | HF/6-31G* | MP2/6-31G* | MP2/6-311G* |
| --- | --- | --- | --- |
| P-O | 147.4 | 150.7 | 149.7 |
| P-C | 181.9 | 182.0 | 181.5 |
| C-H mean | 108.4 | 109.3 | 109.2 |
| O-P-C | 113.8 | 114.3 | 114.4 |
| C-C-C | 104.8 | 104.2 | 104.2 |
| Energy*b* | -534.4643 | -535.1504 | -535.2606 |

*a* All distances in pm, all angles in °.

*b* Energy in Hartrees, not corrected for zero point energy.
